# Supplementary material for: UAV and field survey investigation of a landslide triggered debris flow and dam formation in Eastern Carpathians
Source: Frontiers journal article supplement (doi:10.3389/feart.2024.1403411), 2024-06-07
Supplement: Table_1.docx [file Table_1.docx]

Supplementary Material

UAV and field survey investigation of a landslide triggered debris flow and dam formation in Eastern Carpathians

Alin Mihu-Pintilie1, Cristian Constantin Stoleriu2* and Andrei Urzică2,3

1 Institute of Interdisciplinary Research, Department of Exact and Natural Sciences, University "Alexandru Ioan Cuza" of Iaşi, Romania

2 Faculty of Geography and Geology, Department of Geography, University "Alexandru Ioan Cuza" of Iaşi, Romania

3 Research Center with Integrated Techniques for Atmospheric Aerosol Investigation in Romania, RECENT AIR, Laboratory of Interdisciplinary Research of Mountain Environment, Ion Gugiuman, Rarău Station for Research and Students Fellowships, Câmpulung-Moldovenesc, Suceava, Romania

*** Correspondence:**Cristian Constantin Stoleriu
[cristoan@yahoo.com](mailto:cristoan@yahoo.com)

**TABLE S1 |** Total precipitation amount (mm) at Luminiș pluviometric station between 1971 and 2021

| **Year** | **Jan** | **Feb** | **Mar** | **Apr** | **May** | **Jun** | **Jul** | **Aug** | **Sep** | **Oct** | **Nov** | **Dec** | **Total** |
| --- | --- | --- | --- | --- | --- | --- | --- | --- | --- | --- | --- | --- | --- |
| **1971** | 11.8 | 18.5 | 25.9 | 23.7 | 233.6 | 84.9 | 92.7 | 77.5 | 102 | 24.6 | 50.9 | 27.2 | 776.5 |
| **1972** | 19.1 | 11.1 | 35.3 | 87.5 | 115.2 | 144.2 | 113.7 | 211.1 | 102.5 | 146.6 | 67.8 | 6.1 | 1060.2 |
| **1973** | 18.6 | 44.8 | 35.3 | 28.3 | 126.8 | 70 | 60.3 | 45.5 | 15.4 | 9.8 | 4.2 | 10.8 | 469.8 |
| **1974** | 4.3 | 11.3 | 14.6 | 42.8 | 114.3 | 142.2 | 126.1 | 102.6 | 65.1 | 38.8 | 27.1 | 14.0 | 703.2 |
| **1975** | 18.5 | 30.0 | 2.4 | 75.2 | 130.3 | 157.6 | 126.2 | 32.5 | 7.7 | 103.1 | 49.9 | 2.3 | 735.7 |
| **1976** | 54.6 | 4.9 | 20.4 | 68.9 | 60.7 | 65.4 | 92.9 | 90.3 | 88.7 | 53.6 | 58.7 | 24.5 | 683.6 |
| **1977** | 23.8 | 19.1 | 7.3 | 116.6 | 76.7 | 108.9 | 99.9 | 139.4 | 46.2 | 20.3 | 20.4 | 17 | 695.6 |
| **1978** | 2.8 | 62.9 | 21.4 | 84.6 | 132.5 | 174 | 52.3 | 82.8 | 109.3 | 7.1 | 40.8 | 12 | 782.5 |
| **1979** | 45.4 | 35.7 | 19.5 | 89.1 | 49.8 | 183 | 85.6 | 130.9 | 17.2 | 39.2 | 51.5 | 13.9 | 760.8 |
| **1980** | 33.1 | 12.1 | 56.3 | 95 | 108.4 | 106.7 | 152.3 | 43.5 | 10.5 | 60.4 | 33.5 | 80.5 | 792.3 |
| **1981** | 43.8 | 22.6 | 34.5 | 71.6 | 129.8 | 69.3 | 100.6 | 15.9 | 73.1 | 37.0 | 62.6 | 30.4 | 691.2 |
| **1982** | 13.2 | 26.8 | 57.2 | 42.7 | 43.8 | 75.3 | 97.7 | 45.3 | 4.9 | 18.6 | 8.8 | 48.3 | 482.6 |
| **1983** | 13.3 | 16.7 | 17.7 | 30.4 | 57.8 | 102.2 | 41.6 | 117.3 | 10.5 | 16.6 | 30.3 | 27.5 | 481.9 |
| **1984** | 67.8 | 88.7 | 73.3 | 205.9 | 168.4 | 88.6 | 110.8 | 47.8 | 21.9 | 16.2 | 45.8 | 35.0 | 970.2 |
| **1985** | 41.3 | 29.1 | 3.9 | 43.2 | 66.8 | 176.7 | 54.1 | 55.1 | 9.3 | 13.8 | 46.6 | 8.1 | 548.0 |
| **1986** | 7.2 | 78.9 | 16.6 | 16.2 | 43.2 | 103.7 | 140.2 | 6.3 | 9.3 | 28.4 | 3.9 | 6.4 | 460.3 |
| **1987** | 33.0 | 7.6 | 27.8 | 44.8 | 78.5 | 78.0 | 95.6 | 83.3 | 9.8 | 48.2 | 49.5 | 23.5 | 579.6 |
| **1988** | 51.7 | 44.0 | 130.2 | 110.9 | 107.8 | 98.9 | 88.3 | 37.2 | 67.4 | 19.0 | 9.2 | 27.7 | 792.3 |
| **1989** | 7.7 | 5.7 | 17.2 | 67.6 | 84.4 | 189.8 | 30.0 | 85.0 | 126.0 | 10.8 | 18.2 | 13.4 | 655.8 |
| **1990** | 11.8 | 13.6 | 5.0 | 74.4 | 80.5 | 100.7 | 59.8 | 18.8 | 13.1 | 29.2 | 8.0 | 59.1 | 474.0 |
| **1991** | 7.3 | 24.2 | 23.5 | 47.6 | 187.9 | 154.3 | 324.5 | 104.2 | 62.0 | 40.6 | 14.0 | 12.9 | 1003 |
| **1992** | 6.1 | 17.2 | 44.8 | 26.9 | 45.4 | 172.3 | 31.8 | 45.9 | 36.0 | 53.1 | 14.5 | 18.3 | 512.3 |
| **1993** | 11.3 | 32.4 | 52.4 | 52.4 | 109.8 | 45.0 | 46.3 | 38.5 | 59.3 | 25.5 | 53.5 | 54.9 | 581.3 |
| **1994** | 9.8 | 22.0 | 12.5 | 37.3 | 51.6 | 81.3 | 111.8 | 71.8 | 5.2 | 90.9 | 11.5 | 16.0 | 521.7 |
| **1995** | 40.8 | 22.5 | 77.8 | 35.6 | 100.1 | 151.4 | 24.8 | 82.4 | 79.7 | 2.1 | 87.5 | 57.1 | 761.8 |
| **1996** | 33.3 | 46.2 | 42.1 | 121.7 | 97.5 | 78.8 | 85.0 | 141.8 | 107.0 | 30.1 | 32.1 | 62.7 | 878.3 |
| **1997** | 0.9 | 21.1 | 30.7 | 130.2 | 57.0 | 62.5 | 121.8 | 245.4 | 61.9 | 53.2 | 18.9 | 55.7 | 859.3 |
| **1998** | 56.1 | 7.8 | 45.5 | 42.2 | 126.9 | 177.0 | 88.0 | 36.5 | 96.0 | 79.8 | 50.6 | 15.6 | 822.0 |
| **1999** | 29.2 | 23.6 | 37.5 | 103.3 | 54.1 | 80.4 | 133.1 | 64.2 | 24.5 | 53.8 | 26.9 | 47.9 | 678.5 |
| **2000** | 25.2 | 28.1 | 28.8 | 52.8 | 36.5 | 106.1 | 101.6 | 71.2 | 109.6 | 7.2 | 15.0 | 14.4 | 596.5 |
| **2001** | 21.4 | 24.5 | 32.0 | 47.4 | 92.6 | 72.2 | 96.3 | 58.4 | 198.2 | 35.7 | 52.2 | 24.3 | 755.2 |
| **2002** | 11.8 | 12.1 | 51.5 | 25.5 | 71.4 | 90.6 | 179.1 | 144.4 | 45.3 | 47.2 | 58.6 | 23.8 | 761.3 |
| **2003** | 20.1 | 51.4 | 48.1 | 45.6 | 32.9 | 47.5 | 124.5 | 12.3 | 74.2 | 94.7 | 18.6 | 18.8 | 588.7 |
| **2004** | 56.0 | 12.4 | 35.1 | 57.6 | 51.0 | 66.4 | 184.0 | 94.4 | 46.6 | 26.3 | 63.4 | 12.3 | 705.5 |
| **2005** | 40.5 | 51.5 | 20.7 | 51.4 | 77.9 | 118.2 | 246.5 | 170.6 | 42.1 | 32.3 | 30.5 | 20.6 | 902.8 |
| **2006** | 47.6 | 18.9 | 102.8 | 72.1 | 69.8 | 142.7 | 91.0 | 111.0 | 25.2 | 26.2 | 8.3 | 13.3 | 728.9 |
| **2007** | 18.1 | 20.5 | 99.5 | 63.2 | 47.7 | 34.3 | 75.3 | 100.7 | 51.3 | 159.8 | 49 | 62.2 | 781.6 |
| **2008** | 19.5 | 6.1 | 15.5 | 112.9 | 60.7 | 107.8 | 209.2 | 27.4 | 53.9 | 50.3 | 29.0 | 38.0 | 730.3 |
| **2009** | 76.7 | 60.0 | 36.6 | 0.7 | 109.9 | 122.9 | 78.8 | 51.5 | 27.5 | 55.2 | 17.8 | 32.9 | 670.5 |
| **2010** | 47.7 | 40.0 | 45.4 | 32 | 158.4 | 254.2 | 127.4 | 59.1 | 64 | 61.5 | 32.6 | 66.7 | 1007 |
| **2011** | 23.6 | 26.1 | 16.7 | 16.7 | 62.1 | 187.1 | 92.5 | 29.5 | 22.1 | 55.6 | 2.8 | 15.1 | 549.9 |
| **2012** | 49 | 69.4 | 27.1 | 114.3 | 155.4 | 55.8 | 44.3 | 42.5 | 23.8 | 20 | 8.4 | 88.4 | 698.4 |
| **2013** | 48.9 | 48.2 | 56.3 | 42.6 | 76.9 | 161.7 | 57.4 | 45.6 | 31.9 | 30.6 | 36.1 | 6 | 642.2 |
| **2014** | 65.1 | 13.2 | 52.6 | 137.4 | 160.8 | 90.6 | 127.5 | 22.1 | 3 | 54.2 | 44.5 | 73 | 844 |
| **2015** | 12.5 | 43.4 | 72.4 | 44.6 | 6 | 64.3 | 100.3 | 26.5 | 47.6 | 91 | 40.1 | 6 | 554.7 |
| **2016** | 14.7 | 11.2 | 39.7 | 83.9 | 172.7 | 183.2 | 23.8 | 22.6 | 54.8 | 190.6 | 51.1 | 10.8 | 859.1 |
| **2017** | 16.9 | 12.6 | 47 | 99.9 | 149.6 | 93.9 | 54.5 | 46.1 | 64.5 | 80.7 | 13.9 | 17.9 | 697.5 |
| **2018** | 39.9 | 60.2 | 76.4 | 16.3 | 30.8 | 244.5 | 267.5 | 9.4 | 8.6 | 0.0 | 64.1 | 23.8 | 841.5 |
| **2019** | 61.5 | 21.2 | 10.4 | 51.9 | 137.1 | 183.7 | 53.7 | 40 | 47.9 | 53 | 28.5 | 14 | 702.9 |
| **2020** | 2.1 | 18.4 | 29.7 | 6.4 | 64.1 | 194.7 | 84.1 | 51.6 | 65.6 | 62.9 | 12 | 56.8 | 648.4 |
| **2021** | 22.8 | 14.2 | 33.4 | 44.8 | 43.6 | 142 | 96.2 | 95.1 | 31.6 | 3 | 16.4 | 72.6 | 615.7 |

**TABLE S2 |** Mean monthly discharge (m3/s) at Luminiș gauging station between 1950 and 2021

| **Year** | **Jan** | **Feb** | **Mar** | **Apr** | **May** | **Jun** | **Jul** | **Aug** | **Sep** | **Oct** | **Nov** | **Dec** | **Mean** |
| --- | --- | --- | --- | --- | --- | --- | --- | --- | --- | --- | --- | --- | --- |
| **1950** | 0.318 | 0.268 | 0.365 | 1.575 | 0.990 | 0.323 | 0.183 | 0.298 | 0.268 | 0.130 | 0.208 | 0.190 | 0.426 |
| **1951** | 0.125 | 0.118 | 0.245 | 1.328 | 0.448 | 0.590 | 0.285 | 0.785 | 0.493 | 0.268 | 0.198 | 0.203 | 0.424 |
| **1952** | 0.188 | 0.203 | 0.588 | 1.283 | 0.925 | 1.663 | 0.870 | 0.415 | 0.240 | 0.565 | 0.460 | 0.483 | 0.657 |
| **1953** | 0.398 | 0.218 | 0.813 | 3.450 | 2.550 | 1.088 | 0.943 | 0.498 | 0.283 | 0.195 | 0.140 | 0.140 | 0.893 |
| **1954** | 0.403 | 0.148 | 0.468 | 0.720 | 2.250 | 2.243 | 1.565 | 0.370 | 0.270 | 0.283 | 0.238 | 0.390 | 0.779 |
| **1955** | 0.573 | 0.280 | 0.768 | 1.288 | 1.638 | 1.883 | 2.775 | 3.425 | 1.750 | 1.060 | 0.570 | 0.400 | 1.368 |
| **1956** | 0.355 | 0.335 | 0.328 | 3.000 | 2.388 | 0.805 | 0.500 | 0.508 | 0.328 | 0.398 | 0.345 | 0.435 | 0.810 |
| **1957** | 0.465 | 0.650 | 0.643 | 1.020 | 2.500 | 1.013 | 0.500 | 0.398 | 0.260 | 0.258 | 0.208 | 0.313 | 0.686 |
| **1958** | 0.145 | 0.435 | 0.373 | 1.663 | 1.008 | 0.815 | 0.620 | 0.510 | 1.280 | 0.298 | 0.300 | 0.160 | 0.634 |
| **1959** | 0.203 | 0.115 | 0.263 | 0.373 | 0.680 | 2.493 | 1.018 | 0.848 | 0.428 | 0.225 | 0.660 | 0.260 | 0.631 |
| **1960** | 0.200 | 0.468 | 0.413 | 0.603 | 3.050 | 1.613 | 0.713 | 0.555 | 0.268 | 0.225 | 0.275 | 0.310 | 0.724 |
| **1961** | 0.200 | 0.160 | 0.473 | 0.790 | 1.945 | 0.890 | 0.408 | 0.473 | 0.195 | 0.198 | 0.185 | 0.140 | 0.505 |
| **1962** | 0.185 | 0.180 | 0.740 | 2.800 | 1.465 | 0.905 | 0.560 | 0.463 | 0.330 | 0.188 | 0.250 | 0.175 | 0.687 |
| **1963** | 0.115 | 0.260 | 0.270 | 0.988 | 0.598 | 0.770 | 0.428 | 0.200 | 0.098 | 0.125 | 0.103 | 0.068 | 0.335 |
| **1964** | 0.123 | 0.135 | 0.385 | 0.528 | 0.595 | 0.910 | 1.425 | 0.438 | 0.915 | 0.708 | 0.320 | 0.398 | 0.573 |
| **1965** | 0.391 | 0.825 | 1.968 | 1.127 | 2.832 | 2.700 | 0.576 | 0.180 | 0.161 | 0.125 | 0.287 | 0.389 | 0.963 |
| **1966** | 0.330 | 1.657 | 1.158 | 1.595 | 1.135 | 1.047 | 0.769 | 1.503 | 0.137 | 0.221 | 0.442 | 0.343 | 0.861 |
| **1967** | 0.119 | 0.223 | 0.761 | 1.132 | 0.820 | 0.653 | 0.607 | 0.159 | 0.099 | 0.111 | 0.103 | 0.051 | 0.403 |
| **1968** | 0.063 | 0.350 | 0.563 | 0.246 | 0.103 | 0.030 | 0.208 | 0.393 | 0.331 | 0.304 | 0.432 | 0.161 | 0.265 |
| **1969** | 0.142 | 0.230 | 0.563 | 2.703 | 0.940 | 4.123 | 3.234 | 0.563 | 0.287 | 0.150 | 0.155 | 0.265 | 1.113 |
| **1970** | 0.447 | 0.603 | 1.506 | 2.024 | 6.070 | 1.597 | 7.161 | 0.408 | 0.160 | 0.194 | 0.572 | 0.181 | 1.744 |
| **1971** | 0.219 | 0.151 | 0.350 | 0.312 | 5.360 | 1.001 | 0.844 | 0.262 | 0.441 | 0.244 | 0.333 | 0.295 | 0.818 |
| **1972** | 0.097 | 0.167 | 0.454 | 0.919 | 1.493 | 0.941 | 2.178 | 2.874 | 1.325 | 2.534 | 0.792 | 0.437 | 1.184 |
| **1973** | 0.272 | 0.340 | 0.811 | 0.952 | 1.411 | 0.772 | 0.447 | 0.250 | 0.142 | 0.120 | 0.106 | 0.094 | 0.476 |
| **1974** | 0.048 | 0.125 | 0.142 | 0.171 | 0.337 | 1.259 | 0.865 | 0.807 | 0.363 | 0.282 | 0.310 | 0.198 | 0.409 |
| **1975** | 0.190 | 0.091 | 0.502 | 0.621 | 3.530 | 1.719 | 0.689 | 0.225 | 0.121 | 0.244 | 0.100 | 0.139 | 0.681 |
| **1976** | 0.114 | 0.093 | 0.231 | 1.340 | 0.421 | 0.382 | 0.431 | 0.961 | 0.685 | 0.453 | 0.616 | 0.334 | 0.505 |
| **1977** | 0.230 | 0.332 | 0.380 | 1.821 | 0.721 | 1.420 | 0.558 | 1.218 | 0.346 | 0.227 | 0.188 | 0.127 | 0.631 |
| **1978** | 0.093 | 0.093 | 0.781 | 1.112 | 1.463 | 1.515 | 0.965 | 0.494 | 0.609 | 0.229 | 0.256 | 0.328 | 0.662 |
| **1979** | 0.309 | 0.391 | 0.466 | 1.914 | 0.482 | 1.597 | 0.825 | 2.298 | 0.377 | 0.251 | 0.273 | 0.175 | 0.780 |
| **1980** | 0.138 | 0.352 | 0.328 | 2.436 | 1.968 | 1.763 | 0.951 | 0.665 | 0.278 | 0.295 | 0.337 | 0.453 | 0.830 |
| **1981** | 0.309 | 0.447 | 1.088 | 1.050 | 3.323 | 0.594 | 0.827 | 0.350 | 0.534 | 0.431 | 1.011 | 0.621 | 0.882 |
| **1982** | 0.518 | 0.191 | 0.816 | 1.309 | 1.008 | 0.478 | 0.934 | 0.330 | 0.161 | 0.189 | 0.153 | 0.169 | 0.521 |
| **1983** | 0.217 | 0.185 | 0.191 | 0.214 | 0.336 | 0.788 | 0.337 | 1.277 | 0.185 | 0.146 | 0.147 | 0.178 | 0.350 |
| **1984** | 0.274 | 0.292 | 0.874 | 5.193 | 3.035 | 1.251 | 0.738 | 0.475 | 0.255 | 0.166 | 0.231 | 0.197 | 1.082 |
| **1985** | 0.081 | 0.133 | 0.285 | 0.823 | 0.517 | 1.569 | 0.728 | 0.193 | 0.088 | 0.104 | 0.121 | 0.288 | 0.411 |
| **1986** | 0.078 | 0.096 | 0.364 | 0.274 | 0.149 | 0.396 | 0.337 | 0.161 | 0.054 | 0.096 | 0.083 | 0.079 | 0.181 |
| **1987** | 0.070 | 0.113 | 0.184 | 0.332 | 0.401 | 0.213 | 0.340 | 0.238 | 0.062 | 0.116 | 0.195 | 0.296 | 0.213 |
| **1988** | 0.158 | 0.294 | 2.264 | 3.421 | 1.593 | 2.244 | 0.590 | 0.245 | 0.371 | 0.148 | 0.132 | 0.099 | 0.963 |
| **1989** | 0.091 | 0.097 | 0.232 | 0.452 | 0.591 | 0.841 | 0.432 | 0.282 | 1.190 | 0.200 | 0.161 | 0.139 | 0.392 |
| **1990** | 0.119 | 0.237 | 0.180 | 0.300 | 0.554 | 0.598 | 0.215 | 0.092 | 0.067 | 0.076 | 0.084 | 0.076 | 0.217 |
| **1991** | 0.109 | 0.065 | 0.224 | 0.334 | 2.380 | 1.560 | 4.660 | 3.250 | 0.705 | 0.366 | 0.299 | 0.223 | 1.181 |
| **1992** | 0.269 | 0.233 | 0.641 | 0.683 | 0.426 | 2.380 | 0.388 | 0.149 | 0.109 | 0.173 | 0.108 | 0.102 | 0.472 |
| **1993** | 0.129 | 0.105 | 0.509 | 1.600 | 2.380 | 0.557 | 0.319 | 0.181 | 0.181 | 0.168 | 0.133 | 0.641 | 0.575 |
| **1994** | 0.582 | 0.423 | 0.665 | 0.431 | 0.345 | 0.677 | 0.528 | 0.166 | 0.114 | 0.290 | 0.178 | 0.154 | 0.379 |
| **1995** | 0.160 | 0.304 | 0.454 | 0.691 | 0.903 | 1.040 | 0.510 | 0.232 | 0.238 | 0.101 | 0.410 | 0.593 | 0.470 |
| **1996** | 0.271 | 0.232 | 0.289 | 3.960 | 2.950 | 0.402 | 0.399 | 1.380 | 1.130 | 0.486 | 0.283 | 0.656 | 1.037 |
| **1997** | 0.231 | 0.285 | 0.557 | 1.890 | 1.100 | 0.575 | 0.655 | 2.320 | 1.290 | 0.676 | 0.331 | 0.544 | 0.871 |
| **1998** | 0.503 | 0.681 | 0.533 | 0.817 | 2.120 | 2.260 | 0.597 | 0.207 | 0.417 | 0.445 | 0.323 | 0.338 | 0.770 |
| **1999** | 0.406 | 0.261 | 0.768 | 1.650 | 0.708 | 0.444 | 1.220 | 0.642 | 0.240 | 0.210 | 0.224 | 0.205 | 0.582 |
| **2000** | 0.159 | 0.372 | 0.407 | 0.539 | 0.387 | 0.368 | 0.383 | 0.302 | 0.530 | 0.189 | 0.112 | 0.122 | 0.323 |
| **2001** | 0.116 | 0.183 | 0.288 | 0.330 | 0.240 | 0.351 | 0.387 | 0.248 | 1.410 | 0.311 | 0.250 | 0.233 | 0.362 |
| **2002** | 0.377 | 0.455 | 0.399 | 0.701 | 0.736 | 0.566 | 0.825 | 1.940 | 0.336 | 0.299 | 0.571 | 0.189 | 0.616 |
| **2003** | 0.220 | 0.204 | 0.858 | 1.440 | 0.371 | 0.212 | 0.246 | 0.192 | 0.364 | 0.424 | 0.245 | 0.181 | 0.413 |
| **2004** | 0.221 | 0.649 | 0.605 | 0.988 | 0.433 | 0.227 | 0.626 | 1.090 | 0.253 | 0.334 | 0.381 | 0.290 | 0.508 |
| **2005** | 0.195 | 0.304 | 0.825 | 0.618 | 1.090 | 0.791 | 3.910 | 1.680 | 0.592 | 0.264 | 0.227 | 0.233 | 0.894 |
| **2006** | 0.297 | 0.278 | 1.310 | 1.760 | 0.556 | 1.880 | 1.300 | 0.781 | 0.250 | 0.190 | 0.175 | 0.169 | 0.746 |
| **2007** | 0.261 | 0.232 | 0.866 | 0.645 | 0.333 | 0.298 | 0.241 | 0.317 | 0.267 | 0.838 | 0.594 | 0.565 | 0.455 |
| **2008** | 0.436 | 0.548 | 0.383 | 1.710 | 0.855 | 1.300 | 1.670 | 0.448 | 0.275 | 0.416 | 0.170 | 0.374 | 0.715 |
| **2009** | 0.368 | 1.050 | 0.908 | 0.544 | 0.457 | 0.790 | 0.568 | 0.163 | 0.117 | 0.214 | 0.159 | 0.164 | 0.459 |
| **2010** | 0.434 | 0.341 | 1.130 | 0.428 | 1.500 | 3.320 | 1.420 | 0.483 | 0.372 | 0.442 | 0.227 | 0.554 | 0.888 |
| **2011** | 0.274 | 0.252 | 0.399 | 0.831 | 0.484 | 1.100 | 0.591 | 0.261 | 0.136 | 0.171 | 0.124 | 0.122 | 0.395 |
| **2012** | 0.101 | 0.055 | 0.267 | 0.829 | 0.971 | 0.525 | 0.138 | 0.096 | 0.065 | 0.071 | 0.084 | 0.190 | 0.283 |
| **2013** | 0.135 | 0.137 | 0.368 | 0.640 | 0.219 | 0.104 | 0.285 | 0.137 | 0.115 | 0.151 | 0.144 | 0.086 | 0.210 |
| **2014** | 0.093 | 0.377 | 0.376 | 1.880 | 1.880 | 0.882 | 0.610 | 0.207 | 0.135 | 0.226 | 0.232 | 0.406 | 0.609 |
| **2015** | 0.377 | 0.581 | 1.01 | 1.10 | 0.304 | 0.250 | 0.229 | 0.121 | 0.131 | 0.248 | 0.099 | 0.216 | 0.389 |
| **2016** | 0.296 | 0.221 | 0.193 | 0.397 | 1.030 | 3.240 | 0.287 | 0.201 | 0.220 | 0.723 | 0.558 | 0.367 | 0.644 |
| **2017** | 0.211 | 0.312 | 0.694 | 1.170 | 1.710 | 1.240 | 0.620 | 0.355 | 0.179 | 0.247 | 0.143 | 0.243 | 0.594 |
| **2018** | 0.259 | 0.403 | 1.440 | 0.968 | 0.176 | 1.010 | 1.670 | 0.693 | 0.134 | 0.100 | 0.166 | 0.242 | 0.605 |
| **2019** | 0.273 | 0.559 | 0.471 | 0.948 | 1.270 | 1.860 | 0.476 | 0.217 | 0.165 | 0.183 | 0.132 | 0.149 | 0.559 |
| **2020** | 0.152 | 0.202 | 0.212 | 0.303 | 1.490 | 0.352 | 0.379 | 0.132 | 0.259 | 0.112 | 0.301 | 0.339 | 0.353 |
| **2021** | 0.300 | 0.248 | 0.427 | 0.796 | 0.360 | 1.440 | 0.618 | 0.660 | 0.374 | 0.185 | 0.221 | 0.321 | 0.496 |
